# Supplementary material
Source: publisher figshare collection journal article supplement (https://tandf.figshare.com/ndownloader/files/17560268)
Supplement: Supplementary file 1 [file 17560268]

## Sheet: Woodham dike OU81952
Granodioritic pegmatite–aplite dike intruding Woodham Orthogneiss hbl–bt qz monzodioritic orthogneiss (OU81952) LA–ICP–MS U–Th–Pb zircon data.
											Measured isotopic ratiosa											208Pb-corrected (*) dates (Ma)b, c
Analysis ID	Grain	Spot no.	Ti (ppm)	± 1σ	Pb* (ppm)	U (ppm)	± 1σ	Th (ppm)	± 1σ		232Th/238U	± 1σ	206Pb/238U	± 1σ	207Pb/235U	± 1σ	207Pb/206Pb	± 1σ	208Pb/232Th	± 1σ		206Pb*/238U	± 1σ	207Pb*/235U	± 1σ	207Pb*/206Pb*	± 1σ	206Pb*/238U–207Pb*/235U concord. (%)	206Pbc (%)	± 1σ	MSWD	Selected	± 1σ
C:\ICPCHEM\1\DATA\palin\100903b\130-05.D	5	05	680.375	2.70644	28.3804	1707.89	26.6804	42.1594	1.17644		0.0253235	0.000585526	0.0168093	0.000157673	0.267599	0.00887141	0.115461	0.00367132	0.128277	0.00635915		98.2718	1.00533	92.3643	10.4998	1.97006	0.227524	106.396	8.61465	0.390659	2.55607
C:\ICPCHEM\1\DATA\palin\100903b\130-27.D	25	27	1280.8	21.8385	1.84945	114.691	2.67251	12.6647	0.364999		0.11328	0.00192119	0.0167223	0.000392781	0.182505	0.0200319	0.0791546	0.00848681	0.0146239	0.00145275		103.727	2.46027	117.591	19.3307	407.832	57.9236	88.2103	2.99918	0.43363	2.55607
C:\ICPCHEM\1\DATA\palin\100903b\130-31.D	29	31	7.46953	0.0883126	14.1337	654.619	25.4796	545.451	24.4443		0.854783	0.0189869	0.0180586	0.000469978	0.269292	0.0220983	0.108153	0.00841692	0.00948288	0.000571122		104.227	2.95042	58.9968	29.1727	0.0195096	0.00573157	176.666	9.74033	1.05667	4.86994
C:\ICPCHEM\1\DATA\palin\100903c\130-34.D	31	34	4.85483	0.051821	2.81067	168.501	2.69597	21.9808	0.463658		0.133822	0.00183955	0.017274	0.000372304	0.176897	0.0163967	0.0742724	0.00669567	0.0127606	0.00102154		107.113	2.34368	110.572	16.7762	185.157	26.8504	96.8718	3.00607	0.457372	2.55607	107.113	2.84837
C:\ICPCHEM\1\DATA\palin\100903b\130-17.D	17	17	6.44042	0.0507779	6.8945	325.43	13.5221	3.13498	0.244347		0.0098825	0.000651679	0.0197118	0.000354043	0.421501	0.0248803	0.155085	0.00872028	0.754021	0.0661186		108.104	2.24258	85.5247	29.3968	0.198637	0.058163	126.401	14.2085	0.920057	2.55607	108.104	2.68555
C:\ICPCHEM\1\DATA\palin\100903b\130-26.D	25	26	5.18023	0.0298701	22.4288	890.476	20.2268	1170.65	30.017		1.34863	0.0160437	0.0189947	0.000226966	0.204783	0.0109013	0.0781917	0.0040562	0.00787109	0.000171451		111.924	1.56508	28.3822	18.5	0.000850164	0.000143223	394.347	7.79569	0.691076	3.52558
C:\ICPCHEM\1\DATA\palin\100903b\130-29.D	27	29	11.8142	0.0427561	10.8894	568.846	20.3039	316.055	15.2113		0.569977	0.0184022	0.0177439	0.00020402	0.128532	0.00585263	0.0525366	0.00231469	0.00632477	0.000137878		112.026	1.3908	99.5661	10.5293	0.588057	0.0600227	112.514	1.20639	0.490251	2.16602	112.026	2.06847
C:\ICPCHEM\1\DATA\palin\100903b\130-18.D	18	18	5.50273	0.0361387	8.52485	478.791	4.86986	155.992	2.4782		0.334229	0.00407893	0.017688	0.000201581	0.130322	0.00594336	0.0534364	0.00235966	0.00621598	0.000162008		112.347	1.28456	112.82	6.24703	123.71	6.67813	99.581	0.60749	0.176409	2.55607	112.347	2.00196
C:\ICPCHEM\1\DATA\palin\100903b\130-15.D	15	15	3.19714	0.0215491	7.7369	409.297	22.279	155.815	8.56298		0.390533	0.00295676	0.0181428	0.000212559	0.157345	0.00843018	0.0628992	0.00328845	0.00840815	0.000293399		112.509	1.36001	90.6651	9.95362	0.21282	0.0202886	124.093	2.95789	0.32805	1.33995
C:\ICPCHEM\1\DATA\palin\100903b\130-11.D	11	11	11.3954	0.0316786	7.30789	356.162	8.94185	225.732	10.7313		0.650182	0.0262477	0.0183074	0.000249906	0.158663	0.00678905	0.0628562	0.00254902	0.00761758	0.000219948		113.519	1.72515	91.3065	14.4617	0.202634	0.0278711	124.327	2.95986	0.677268	1.56312	113.519	2.32019
C:\ICPCHEM\1\DATA\palin\100903b\130-10.D	10	10	4.3946	0.028492	12.4196	566.366	12.1473	584.366	17.8621		1.05847	0.0230519	0.0180087	0.000196427	0.123532	0.00545452	0.0497504	0.00212863	0.006042	0.000124126		113.928	1.44781	98.8526	13.5194	0.37367	0.0482371	115.25	0.991606	0.667132	1.98505	113.928	2.12619
C:\ICPCHEM\1\DATA\palin\100903c\130-32.D	30	32	12.9762	0.0872578	14.9965	571.35	29.4759	571.71	32.4343		1.02651	0.0242267	0.0213973	0.000323129	0.50502	0.019156	0.171179	0.00595624	0.0125996	0.000260528		115.282	2.08907	101.721	25.2721	0.531019	0.12716	113.331	15.6716	0.869237	2.91362	115.282	2.72021
C:\ICPCHEM\1\DATA\palin\100903b\130-02.D	2	02	14.2527	0.0381723	7.44468	374.232	10.6962	208.485	6.30789		0.571509	0.00567202	0.0183715	0.000249073	0.119334	0.0066941	0.0471106	0.00256435	0.00673687	0.000191809		115.311	1.62254	78.9498	10.2732	0.0685424	0.00650499	146.057	1.75734	0.413918	2.14972
C:\ICPCHEM\1\DATA\palin\100903b\130-23.D	22	23	bdl		2.55262	125.285	2.90145	65.2948	1.74432		0.53465	0.00711976	0.0190284	0.000456449	0.286834	0.0197599	0.109327	0.00706013	0.00909043	0.000446611		115.585	2.8953	163.932	21.3646	935.282	84.8625	70.508	4.92184	0.75692	2.56521
C:\ICPCHEM\1\DATA\palin\100903c\130-36.D	33	36	bdl		13.4039	738.792	13.5475	218.657	5.0773		0.30362	0.00432512	0.0181806	0.000399112	0.107866	0.00992277	0.0430306	0.00384408	0.00607164	0.000245364		115.811	2.53403	98.1941	10.151	0.282666	0.0264753	117.94	0.292092	0.23421	2.29967	115.811	3.0797
C:\ICPCHEM\1\DATA\palin\100903b\130-22.D	22	22	6.14803	0.0280672	27.982	1190.74	19.1692	1373.08	26.4675		1.18295	0.0125417	0.0186505	0.000171435	0.132448	0.004705	0.0515053	0.00176733	0.00656259	0.000105238		116.169	1.20541	75.1736	10.7976	0.0505802	0.00500457	154.534	2.50136	0.488774	2.59872
C:\ICPCHEM\1\DATA\palin\100903b\130-12.D	12	12	4.82537	0.0211521	4.83588	234.334	4.93555	151.845	3.37445		0.664743	0.00471234	0.0186832	0.000269855	0.179513	0.00961508	0.0696859	0.00359424	0.00696035	0.000184334		116.94	1.74055	128.168	11.3535	341.442	26.9943	91.2392	2.01953	0.403577	1.76812	116.94	2.36304
C:\ICPCHEM\1\DATA\palin\100903b\130-09.D	9	09	17.434	0.0387147	7.6632	360.708	7.26783	235.596	5.18196		0.670041	0.00591042	0.0189736	0.000233948	0.172819	0.0100113	0.0660604	0.00373914	0.0077785	0.000228453		117.093	1.53652	93.1862	13.0677	0.154118	0.0186038	125.655	3.39148	0.466414	1.6263	117.093	2.21857
C:\ICPCHEM\1\DATA\palin\100903b\130-30.D	28	30	5.04153	0.0483192	6.71847	363.984	6.139	59.3863	4.85179		0.167376	0.0133798	0.0186798	0.000283295	0.141159	0.00866337	0.0548069	0.00325935	0.0119727	0.000997361		117.153	1.83302	97.3235	11.5557	0.249427	0.0266107	120.375	1.82192	0.431202	2.55607	117.153	2.43387
C:\ICPCHEM\1\DATA\palin\100903b\130-16.D	16	16	4.14891	0.0333871	6.16118	290.238	7.49772	242.696	7.09624		0.857823	0.0117489	0.0184009	0.000240415	0.116283	0.00777587	0.0458326	0.00300578	0.00590676	0.000150051		117.213	1.61452	106.053	11.4819	0.814437	0.0870456	110.523	0.282054	0.473022	1.65347	117.213	2.27444
C:\ICPCHEM\1\DATA\palin\100903c\130-33.D	30	33	15.9953	0.0878663	46.7441	2638.13	65.2973	84.4348	2.23416		0.0328333	0.000307143	0.0188584	0.000167818	0.178608	0.00693779	0.0686904	0.00259722	0.0358958	0.00326018		117.451	1.08158	117.215	7.96937	113.404	7.65698	100.201	2.50196	0.261057	3.3537	117.451	2.07856
C:\ICPCHEM\1\DATA\palin\100903b\130-06.D	6	06	88.8733	0.141508	5.27106	258.55	2.75188	161.379	2.14838		0.640314	0.00512019	0.0185756	0.000263602	0.120229	0.00835198	0.0469424	0.00319219	0.00635725	0.000181236		117.518	1.70637	95.8114	10.4282	0.199379	0.0191037	122.655	0.960788	0.361557	1.73551	117.518	2.34338
C:\ICPCHEM\1\DATA\palin\100903b\130-24.D	23	24	10.9247	0.0380128	14.1967	665.034	11.332	493.504	9.68925		0.761264	0.00742481	0.0187696	0.000188338	0.128338	0.00485834	0.0495903	0.00181014	0.00669487	0.00010629		117.791	1.22387	86.6396	7.45888	0.114776	0.00778906	135.955	1.75492	0.298948	1.91853
C:\ICPCHEM\1\DATA\palin\100903b\130-28.D	26	28	11.2269	0.026505	13.8672	697.556	11.7726	354.5	6.54835		0.521346	0.0039149	0.0186366	0.000190735	0.117484	0.00402464	0.0457207	0.00149471	0.00659385	0.000121326		117.875	1.21927	92.7716	5.43799	0.176298	0.00870017	127.06	0.981944	0.203418	2.01897
C:\ICPCHEM\1\DATA\palin\100903b\130-21.D	21	21	22.7804	0.0721765	8.1903	359.106	6.60873	293.715	6.70769		0.839058	0.0113465	0.0193826	0.000289203	0.167284	0.00970501	0.0625952	0.00350932	0.00806299	0.000176941		117.913	1.84724	56.5417	14.0577	0.0135442	0.0016884	208.542	4.76174	0.497781	2.55607
C:\ICPCHEM\1\DATA\palin\100903b\130-20.D	20	20	4.16355	0.0269645	12.3922	571.481	15.4756	423.236	12.159		0.759749	0.00728839	0.0189824	0.00023997	0.132853	0.00554422	0.0507596	0.00201877	0.00710383	0.000163468		118.173	1.56395	73.8399	10.0447	0.0628309	0.00566518	160.04	2.53763	0.419997	2.44364
C:\ICPCHEM\1\DATA\palin\100903b\130-08.D	8	08	5.0373	0.0308193	22.2678	987.114	45.4827	939.747	46.0133		0.976635	0.0161777	0.0188643	0.000174509	0.12909	0.00452841	0.049631	0.0016794	0.00647929	0.000103506		118.584	1.25611	90.7507	11.3367	0.125666	0.0129716	130.67	1.58302	0.527287	3.55861
C:\ICPCHEM\1\DATA\palin\100903c\130-35.D	32	35	9.27583	0.0437174	11.6178	523.258	5.78339	485.886	9.31685		0.952592	0.0149262	0.0188658	0.000221236	0.180379	0.0101437	0.0693441	0.00381387	0.00641531	0.000171523		118.946	1.5363	143.145	13.6902	565.571	44.1061	83.0945	1.28862	0.561932	2.55607	118.946	2.36464
C:\ICPCHEM\1\DATA\palin\100903b\130-04.D	4	04	7.45516	0.0365084	16.7867	792.296	9.47976	540.687	8.96069		0.70008	0.00802799	0.0189506	0.000186594	0.148665	0.00436886	0.0568964	0.00157538	0.00685365	0.000120855		119.004	1.20076	106.578	6.35316	0.684041	0.0396318	111.659	1.68182	0.255495	2.48104	119.004	2.02169
C:\ICPCHEM\1\DATA\palin\100903b\130-19.D	19	19	8.93242	0.0348635	7.94184	396.264	5.8617	166.488	3.00519		0.43101	0.00445852	0.0191217	0.000253575	0.137194	0.00698569	0.0520365	0.00255817	0.00786611	0.000214936		119.343	1.61161	83.0161	8.989	0.0571397	0.00459327	143.759	2.28111	0.307519	2.55607
C:\ICPCHEM\1\DATA\palin\100903c\130-37.D	34	37	bdl		8.67181	405.029	10.1433	292.114	8.12215		0.739871	0.00893766	0.0189827	0.000240867	0.133625	0.00799536	0.0510538	0.00298529	0.00664551	0.000162358		119.503	1.58564	97.8926	11.1435	0.263378	0.0266209	122.076	1.43235	0.42213	1.76169	119.503	2.40332
C:\ICPCHEM\1\DATA\palin\100903b\130-13.D	13	13	4.74741	0.0181946	3.83365	181.72	4.10614	118.177	2.87491		0.667141	0.00601304	0.0190943	0.000321448	0.151181	0.0114308	0.0574239	0.00423283	0.00672778	0.000236198		120.399	2.08691	117.195	13.7576	54.7421	6.55256	102.734	1.2667	0.47028	2.55607	120.399	2.65763
C:\ICPCHEM\1\DATA\palin\100903b\130-25.D	24	25	16.347	0.031959	5.30525	240.148	3.33228	167.457	2.69423		0.715342	0.00582539	0.019586	0.000317028	0.166196	0.00932539	0.0615423	0.00330638	0.00764438	0.000240832		121.15	2.04419	90.189	13.6044	0.116586	0.0140898	134.329	3.13921	0.513405	2.55607
C:\ICPCHEM\1\DATA\palin\100903b\130-31.D	29	31	14.7346	0.200275	8.18253	311.25	7.87253	127.349	3.7364		0.419736	0.00624088	0.0238622	0.000793787	0.659811	0.036794	0.200543	0.00897547	0.0291987	0.0012309		121.636	4.50955	83.5642	44.7189	0.0656276	0.0258913	145.56	20.1752	1.36879	7.14478	121.636	4.80622
C:\ICPCHEM\1\DATA\palin\100903b\130-01.D	1	01	7.9975	0.0317099	9.61491	437.187	9.80345	314.656	11.6816		0.738342	0.0218459	0.0193805	0.000228716	0.130931	0.00614639	0.0489977	0.00222627	0.00702088	0.000170646		121.701	1.5998	89.8317	13.5276	0.131216	0.0157268	135.477	1.66295	0.596666	2.2734
C:\ICPCHEM\1\DATA\palin\100903b\130-14.D	14	14	17.0226	0.0265534	6.95459	306.358	4.39496	271.687	4.46231		0.909763	0.00727587	0.0193107	0.000248083	0.122116	0.00679047	0.0458641	0.00248136	0.00647202	0.000144498		122.174	1.62289	97.632	9.9222	0.210938	0.0185306	125.137	0.920188	0.380865	2.55607
C:\ICPCHEM\1\DATA\palin\100903c\130-40.D	36	40	6.46633	0.0380162	9.58592	426.059	7.65273	353.035	9.81035		0.850034	0.0180237	0.0194118	0.000258768	0.137309	0.00672672	0.0513019	0.00241843	0.00663584	0.000203147		122.668	1.76447	109.057	12.9576	0.581203	0.0672169	112.481	1.03354	0.569973	1.54126	122.668	2.55931
C:\ICPCHEM\1\DATA\palin\100903b\130-07.D	7	07	13.3487	0.0288413	11.6452	564.706	28.3251	169.398	11.4419		0.307734	0.0139207	0.0206057	0.000343512	0.14903	0.00622311	0.0524548	0.00200825	0.00733146	0.00019417		130.781	2.20577	129.268	9.11331	102.628	7.13481	101.17	0.539373	0.349883	4.65548
C:\ICPCHEM\1\DATA\palin\100903b\130-03.D	3	03	33.8808	0.0373999	5.40602	232.833	5.29994	150.664	4.71754		0.663828	0.0142726	0.0209728	0.000329982	0.162335	0.00936411	0.0561378	0.00311546	0.00761439	0.000194885		131.425	2.15183	112.76	13.7056	0.416085	0.0475792	116.553	1.7935	0.501084	1.82578
C:\ICPCHEM\1\DATA\palin\100903c\130-38.D	35	38	180.269	1.25275	4.10712	138.76	1.96751	90.9051	1.46019		0.672068	0.00507235	0.0262484	0.000717865	0.663606	0.0426421	0.183361	0.010662	0.0191353	0.000738954		140.301	4.38256	147.793	48.3559	270.104	83.0344	94.9303	16.175	1.3233	1.83304
C:\ICPCHEM\1\DATA\palin\100903c\130-39.D	35	39	3869	5.2297	7.74005	166.647	7.2491	68.3508	3.25235		0.420761	0.00811448	0.0517463	0.00156046	3.63595	0.15627	0.509609	0.0156061	0.15682	0.00734756		145.006	6.40628	161.621	120.907	412.76	274.02	89.7198	56.0374	1.44926	2.55607
aIsotopic ratio errors include internal (analytical) uncertainty only
b208Pb-corrected age errors include internal (analytical) uncertainty only
cUncertainty in the primary standard has been added in quadrature to the selected 208Pb-corrected ages. For session 100903b: 206Pb/238U 1σTEMORA-2 = 1.37%, 207Pb/206Pb 1σTEMORA-2 = 3.74%. For session 100903c: 206Pb/238U 1σTEMORA-2 = 1.51%, 207Pb/206Pb 1σTEMORA-2 = 4.02%.

## Sheet: Woodham OU81920
Woodham Orthogneiss hbl–bt qz monzodioritic orthogneiss (OU81920) LA–ICP–MS U–Th–Pb zircon data
											Measured isotopic ratiosa											208Pb-corrected (*) dates (Ma)b, c
Analysis ID	Grain	Spot no.	Ti (ppm)	± 1σ	Pb* (ppm)	U (ppm)	± 1σ	Th (ppm)	± 1σ		232Th/238U	± 1σ	206Pb/238U	± 1σ	207Pb/235U	± 1σ	207Pb/206Pb	± 1σ	208Pb/232Th	± 1σ		206Pb*/238U	± 1σ	207Pb*/235U	± 1σ	207Pb*/206Pb*	± 1σ	206Pb*/238U–207Pb*/235U concord. (%)	206Pbc (%)	± 1σ	MSWD	Selected	± 1σ
C:\ICPCHEM\1\DATA\palin\100903c\55B-45.D	39	45	37.3442	0.147759	6.2971	302.473	2.65796	226.322	5.0805		0.767589	0.0158558	0.0184276	0.000236101	0.143784	0.00741268	0.0565899	0.00282592	0.0062837	0.000146659		116.381	1.60193	113.937	12.0205	64.9198	6.9546	102.146	1.13984	0.530089	1.55574	116.381	2.379
C:\ICPCHEM\1\DATA\palin\100903c\55B-21.D	19	21	5819.93	27.6832	13.3812	567.777	9.18066	350.304	8.87046		0.632932	0.0123342	0.0208099	0.000263365	0.395712	0.0201108	0.137914	0.00678824	0.0136232	0.000457746		117.241	1.94994	99.4638	27.7798	0.299243	0.0773468	117.874	11.804	0.972232	3.79292	117.241	2.6347
C:\ICPCHEM\1\DATA\palin\100903c\55B-51.D	44	51	7.22966	0.0279403	2.96562	91.7772	1.6355	65.9286	1.59325		0.736934	0.0120291	0.0290141	0.000756647	1.37571	0.0677305	0.343887	0.0143604	0.0369526	0.00173614		117.713	4.09967	109.457	68.9754	1.69789	1.09488	107.543	36.4861	1.49654	2.17393	117.713	4.469
C:\ICPCHEM\1\DATA\palin\100903c\55B-47.D	41	47	3.8469	0.024448	4.8368	245.721	2.34667	118.832	4.64348		0.496113	0.0187982	0.0186093	0.000273801	0.132092	0.00792489	0.051481	0.00299429	0.00658827	0.000218189		117.895	1.81763	109.542	12.0093	1.60036	0.178048	107.626	0.819342	0.501793	2.17393	117.895	2.54524
C:\ICPCHEM\1\DATA\palin\100903c\55B-38.D	33	38	4.48476	0.0282745	5.22488	270.005	3.29028	132.572	1.86032		0.503698	0.00350466	0.0184638	0.000194825	0.135254	0.00636607	0.0531285	0.00243698	0.00581719	0.000186736		117.924	1.27686	128.552	7.75135	329.538	17.8027	91.7327	0.0129676	0.28391	1.04555	117.924	2.19236
C:\ICPCHEM\1\DATA\palin\100903b\55B-09.D	9	09	7.79915	0.0286746	12.068	474.273	3.58822	742.363	7.64255		1.60575	0.0112109	0.0186507	0.000205371	0.124705	0.00611199	0.0484941	0.002316	0.00598747	9.15511e-05		118.269	1.49942	104.705	13.719	0.519588	0.0658931	112.955	0.72337	0.646839	2.23802	118.269	2.20479
C:\ICPCHEM\1\DATA\palin\100903c\55B-40.D	35	40	8.97899	0.0580587	13.9014	594.043	6.28388	703.528	28.6343		1.21493	0.0477498	0.018583	0.000193644	0.118912	0.00421687	0.0464097	0.00157313	0.00595238	0.000115766		118.93	1.84228	118.115	22.4504	102.842	19.6246	100.69	-0.200848	1.16779	2.65909	118.93	2.5738
C:\ICPCHEM\1\DATA\palin\100903c\55B-26.D	23	26	4.66282	0.0246979	4.70838	228.393	2.11377	107.226	4.74612		0.481623	0.0208467	0.0191819	0.000254172	0.115462	0.00728564	0.0436562	0.00269328	0.0080864	0.000257783		119.736	1.7037	62.692	13.3704	0.0313279	0.00367866	190.991	2.26398	0.541258	1.47107
C:\ICPCHEM\1\DATA\palin\100903c\55B-34.D	29	34	5.29048	0.0239458	6.02818	292.707	3.0282	177.682	2.34969		0.622731	0.00512944	0.018925	0.000205882	0.133792	0.00676448	0.0512737	0.00253165	0.00634283	0.000166924		120.002	1.36228	112.955	9.25315	3.20315	0.270309	106.239	0.714694	0.357115	1.38632	120.002	2.26821
C:\ICPCHEM\1\DATA\palin\100903c\55B-30.D	25	30	16.9734	0.0300695	11.9637	485.519	8.65446	666.713	15.1715		1.40871	0.0199264	0.0188398	0.000173329	0.125713	0.00488964	0.0483953	0.00182893	0.00595832	9.85604e-05		120.446	1.36524	122.393	13.7303	159.724	17.522	98.4097	-0.106436	0.680832	2.19119	120.446	2.27535
C:\ICPCHEM\1\DATA\palin\100903c\55B-32.D	27	32	11.4942	0.0432077	7.52002	286.227	7.74284	405.714	11.7493		1.45411	0.0150324	0.019895	0.000288772	0.259725	0.0179336	0.0946823	0.00639159	0.00743907	0.000173009		120.617	1.98641	132.631	21.9297	353.267	52.3946	90.9418	5.06689	0.769197	2.2331	120.617	2.69603
C:\ICPCHEM\1\DATA\palin\100903c\55B-22.D	20	22	4.01325	0.0251147	8.55628	437.784	6.62415	187.061	3.00518		0.438341	0.00236635	0.01894	0.000188749	0.125931	0.00545349	0.0482228	0.00203226	0.00599888	0.000136811		120.904	1.21485	119.591	6.11849	94.7475	4.8173	101.097	0.0414294	0.188578	1.60254	120.904	2.19418
C:\ICPCHEM\1\DATA\palin\100903c\55B-39.D	34	39	6.74009	0.0237869	8.77362	366.626	4.22614	472.148	6.08192		1.32112	0.0075957	0.0187967	0.000223016	0.12804	0.00583722	0.049404	0.00217467	0.00571583	9.04807e-05		120.982	1.55026	138.074	10.9912	442.826	30.2029	87.621	-0.786273	0.519165	2.26257	120.982	2.39712
C:\ICPCHEM\1\DATA\palin\100903c\55B-44.D	39	44	11.834	0.0302244	10.1414	424.998	21.3845	548.578	32.9897		1.32416	0.0436103	0.0187441	0.000215394	0.135254	0.00773135	0.0523339	0.00293043	0.00564368	0.000136784		121.358	1.9881	156.147	22.8431	723.007	81.1814	77.7203	-1.38627	1.20567	2.03526
C:\ICPCHEM\1\DATA\palin\100903b\55B-11.D	11	11	bdl		3.01797	137.125	1.77431	109.758	2.59337		0.821123	0.0162337	0.0192802	0.000376923	0.150811	0.0129127	0.0567308	0.00472909	0.00650946	0.000235236		121.382	2.50061	113.554	18.0692	2.27702	0.37188	106.894	1.41304	0.699002	1.74929	121.382	3.00088
C:\ICPCHEM\1\DATA\palin\100903c\55B-20.D	18	20	4.95436	0.0285341	6.49671	260.044	4.02759	373.71	7.72031		1.47427	0.0201547	0.0189561	0.000256829	0.134803	0.00766133	0.0515765	0.00284675	0.0058453	0.000130377		121.83	1.90009	141.402	16.5601	483.723	47.8977	86.159	-0.646779	0.807113	1.90017	121.83	2.64581
C:\ICPCHEM\1\DATA\palin\100903b\55B-05.D	5	05	4.95006	0.0671995	11.7807	399.261	11.1468	946.917	27.7197		2.43301	0.02142	0.0185928	0.000470802	0.119138	0.0092086	0.0464735	0.00339386	0.00560408	0.000184121		121.873	3.80877	166.238	35.1807	856.16	131.447	73.3127	-2.64982	1.93161	2.5512
C:\ICPCHEM\1\DATA\palin\100903b\55B-02.D	2	02	5.41639	0.0341902	4.92164	248.8	2.89665	116.355	1.45783		0.479759	0.00222109	0.0190395	0.0002552	0.127856	0.00757518	0.048704	0.00281079	0.00571365	0.000175876		121.949	1.64265	128.367	8.09545	248.452	14.4914	95.0003	-0.304161	0.229593	1.45464	121.949	2.34014
C:\ICPCHEM\1\DATA\palin\100903c\55B-17.D	16	17	4.25684	0.0140517	3.37878	165.556	1.46824	60.272	1.32955		0.373473	0.00754335	0.0196514	0.000284063	0.167268	0.0100011	0.0617331	0.00358157	0.00918125	0.0005114		122.055	1.83678	99.7313	13.0173	0.209625	0.024277	122.384	2.73392	0.454535	1.31717	122.055	2.60311
C:\ICPCHEM\1\DATA\palin\100903b\55B-14.D	13	14	6.77942	0.0355264	14.5385	497.686	8.9659	1121.18	25.431		2.31105	0.0318505	0.0187946	0.00020102	0.126422	0.0050716	0.048785	0.00188625	0.00574707	7.23034e-05		122.151	1.92611	156.233	22.237	710.287	78.0376	78.185	-1.78099	1.19994	2.21904
C:\ICPCHEM\1\DATA\palin\100903b\55B-08.D	8	08	bdl		1.31754	68.1703	1.01342	20.8026	0.363358		0.313049	0.00287077	0.0194536	0.000442302	0.225709	0.0216627	0.0841487	0.0078464	0.00745568	0.000528595		122.536	2.82319	180.284	20.2783	1025.8	77.8262	67.9681	1.3544	0.48392	2.17393
C:\ICPCHEM\1\DATA\palin\100903c\55B-18.D	17	18	9.11454	0.0326522	9.11036	336.438	3.40884	556.981	6.94127		1.69834	0.0123231	0.0195041	0.000248195	0.151413	0.00722632	0.0563035	0.00258985	0.00638628	9.09451e-05		122.609	1.81272	110.847	16.7647	0.807756	0.121401	110.611	1.55062	0.767919	2.88459	122.609	2.59217
C:\ICPCHEM\1\DATA\palin\100903c\55B-37.D	32	37	5.10358	0.0278267	5.20916	232.633	2.14598	215.703	2.80562		0.951206	0.00872219	0.0190947	0.000249628	0.11878	0.00766741	0.0451159	0.00285195	0.00578469	0.000138894		122.723	1.69078	127.417	11.4995	215.451	18.4487	96.316	-0.655279	0.477947	1.52644	122.723	2.50969
C:\ICPCHEM\1\DATA\palin\100903c\55B-41.D	36	41	6.21835	0.0318486	12.2975	441.519	5.0263	936.41	21.382		2.17573	0.0430659	0.0185357	0.000194647	0.123355	0.00525789	0.0482664	0.0019939	0.00538469	8.51931e-05		122.797	2.29763	190.46	28.1056	1141.93	110.202	64.4738	-3.75359	1.6291	2.7288
C:\ICPCHEM\1\DATA\palin\100903c\55B-33.D	28	33	5.61692	0.0304013	8.11544	317.269	5.90241	485.226	9.40388		1.56894	0.00852121	0.0190266	0.000219227	0.126401	0.0065702	0.0481823	0.00244217	0.00578524	0.000111265		122.909	1.57381	144.51	12.5365	515.451	37.2574	85.0523	-1.16999	0.592957	1.8405	122.909	2.43456
C:\ICPCHEM\1\DATA\palin\100903c\55B-27.D	23	27	5.81071	0.0332137	4.77811	199.071	2.7263	238.928	3.5725		1.23125	0.00738895	0.0192359	0.000261556	0.130408	0.00804135	0.0491687	0.00295727	0.00584984	0.000136417		123.597	1.83696	137.461	14.1551	383.902	34.8706	89.9143	-0.634833	0.638656	1.81954	123.597	2.61981
C:\ICPCHEM\1\DATA\palin\100903c\55B-19.D	17	19	5.41227	0.0237696	3.11499	161.658	1.72354	47.562	0.612978		0.301822	0.00218546	0.0194247	0.000326744	0.145223	0.0123453	0.0542223	0.00451827	0.00626931	0.000330494		123.796	2.09156	133.943	12.2686	317.594	26.2572	92.424	0.181839	0.282802	1.74436	123.796	2.80621
C:\ICPCHEM\1\DATA\palin\100903b\55B-12.D	12	12	bdl		2.25415	118.085	1.27217	28.6912	0.392613		0.249255	0.00210306	0.0195264	0.000373449	0.173036	0.0155818	0.0642708	0.00565552	0.00688266	0.00049337		123.952	2.38401	150.394	15.0137	590.394	47.2942	82.4182	0.574974	0.334397	2.17393	123.952	2.92464
C:\ICPCHEM\1\DATA\palin\100903b\55B-16.D	15	16	bdl		3.72178	195.667	2.53824	40.7808	0.597977		0.213809	0.00146161	0.0195693	0.000358134	0.136314	0.00919011	0.0505199	0.0032781	0.00698822	0.000384991		124.33	2.27109	119.529	9.41693	29.0203	2.32645	104.017	0.487925	0.227779	2.17393	124.33	2.83643
C:\ICPCHEM\1\DATA\palin\100903b\55B-07.D	7	07	4.78898	0.0235615	2.49804	110.045	2.85266	94.3899	5.33903		0.879925	0.0442371	0.0195727	0.000392862	0.155872	0.0159858	0.0577583	0.00580898	0.00644253	0.000371491		124.478	2.93403	139.149	28.4676	397.058	71.523	89.4567	0.385416	1.27378	1.2858	124.478	3.39159
C:\ICPCHEM\1\DATA\palin\100903c\55B-35.D	30	35	3.75349	0.0253911	1.55043	64.5485	1.4049	30.6038	0.757002		0.486382	0.00571641	0.0217042	0.000534787	0.428844	0.0438802	0.143303	0.0142316	0.0165127	0.00143512		124.53	3.51816	156.496	46.0532	672.626	155.555	79.5743	10.1299	1.29165	2.17393	124.53	3.9899
C:\ICPCHEM\1\DATA\palin\100903c\55B-43.D	38	43	153.112	0.623596	11.2719	352.501	3.70597	1010.1	15.9409		2.93963	0.0345984	0.0185358	0.000179447	0.125047	0.00614598	0.0489284	0.00235769	0.00547412	7.18965e-05		124.597	2.37505	220.03	29.0385	1423.83	111.406	56.6273	-5.28906	1.75144	1.8031
C:\ICPCHEM\1\DATA\palin\100903b\55B-10.D	10	10	9.11523	0.0825933	11.7897	439.745	8.12116	760.278	21.2946		1.77362	0.037349	0.0191926	0.000256693	0.124953	0.00643811	0.0472184	0.0023495	0.00573856	8.37668e-05		124.612	2.27047	154.037	24.5996	634.51	80.7488	80.8975	-1.6978	1.28466	3.46364	124.612	2.83825
C:\ICPCHEM\1\DATA\palin\100903c\55B-31.D	26	31	3.41172	0.0201113	3.25827	167.884	1.77768	51.139	0.811448		0.312488	0.00369285	0.0195036	0.000277793	0.116023	0.00855355	0.0431445	0.00312083	0.00584218	0.00027504		124.819	1.78465	116.603	9.08133	2.25972	0.179454	107.045	-0.243665	0.236231	1.19012	124.819	2.59677
C:\ICPCHEM\1\DATA\palin\100903c\55B-29.D	25	29	14.6741	0.0315304	19.175	707.744	6.62502	1154.93	14.0321		1.67405	0.0129665	0.0195807	0.000163889	0.125806	0.00473945	0.0465986	0.00171162	0.00619605	7.62247e-05		124.921	1.26119	118.891	12.3925	10.7857	1.17469	105.072	0.0678955	0.581513	2.9432	124.921	2.2704
C:\ICPCHEM\1\DATA\palin\100903c\55B-50.D	44	50	10.7404	0.0248309	18.6938	604.328	7.06636	1498.66	21.7928		2.54402	0.0219923	0.019129	0.000200274	0.126922	0.00397162	0.0481219	0.00141904	0.00578138	6.53916e-05		125.313	1.8351	173.723	19.6589	897.042	72.808	72.1336	-2.61576	1.07154	3.88611
C:\ICPCHEM\1\DATA\palin\100903c\55B-42.D	37	42	4.52368	0.0228653	3.41443	132.555	6.91214	147.488	9.59124		1.14143	0.0443522	0.0204182	0.000437449	0.15029	0.0141131	0.0533841	0.00488086	0.00769597	0.000269164		125.351	3.16954	56.21	33.2509	0.0246273	0.00683154	223.004	3.83415	1.33555	1.63299	125.351	3.69252
C:\ICPCHEM\1\DATA\palin\100903c\55B-48.D	42	48	15.5101	0.032211	5.16297	215.552	11.0353	237.326	13.066		1.12949	0.0228725	0.0196048	0.000337803	0.144979	0.0125689	0.0536341	0.00455704	0.00608613	0.000179129		125.585	2.34869	144.596	18.6279	468.895	51.4212	86.8525	-0.344917	0.775572	2.46118	125.585	3.01968
C:\ICPCHEM\1\DATA\palin\100903c\55B-49.D	43	49	8.26309	0.0255696	16.6355	581.967	8.21172	1229.82	19.3971		2.16786	0.0152778	0.0190144	0.000181014	0.119707	0.00442067	0.0456598	0.00162919	0.00550156	5.97619e-05		126.35	1.45988	195.742	12.8213	1144.39	48.7809	64.549	-4.09639	0.702274	2.84859
C:\ICPCHEM\1\DATA\palin\100903b\55B-03.D	3	03	6.6007	0.0268503	15.2865	525.04	4.10536	1087.33	11.8724		2.12451	0.0161911	0.0194322	0.000199927	0.132306	0.00611256	0.0493805	0.00222411	0.00588582	8.17235e-05		126.419	1.66042	165.204	16.7255	764.67	58.5031	76.5227	-1.91471	0.853092	2.32604
C:\ICPCHEM\1\DATA\palin\100903b\55B-04.D	4	04	6.69028	0.0389134	14.2227	463.604	4.37898	1053.51	35.3732		2.33121	0.0751126	0.0198325	0.00022793	0.18661	0.00829223	0.0682427	0.00292926	0.00625474	9.64108e-05		126.545	3.6177	172.896	50.1052	865.807	182.839	73.1919	0.0413326	2.64725	2.2962	126.545	4.00988
C:\ICPCHEM\1\DATA\palin\100903c\55B-46.D	40	46	5.57087	0.0349865	3.3141	150.711	1.83071	91.5315	1.90333		0.623037	0.0105153	0.0201317	0.000287484	0.15281	0.0121575	0.0550515	0.00430877	0.00716192	0.000239302		126.558	1.90519	111.787	15.3166	0.516913	0.068744	113.214	1.517	0.513439	1.11334	126.558	2.69961
C:\ICPCHEM\1\DATA\palin\100903c\55B-28.D	24	28	21.1589	0.174802	7.35649	278.82	6.08417	413.581	15.3992		1.52169	0.0459085	0.0201908	0.000365258	0.250472	0.0186577	0.0899713	0.00650133	0.00654563	0.00016907		126.679	3.23096	192.948	36.8097	1107.69	140.179	65.6546	1.71038	1.80205	2.51822
C:\ICPCHEM\1\DATA\palin\100903b\55B-01.D	1	01	4.18056	0.0232487	5.97565	243.025	9.6803	294.833	12.0623		1.24456	0.0116213	0.019676	0.000351932	0.145449	0.0101109	0.0536136	0.00360146	0.00596479	0.000184694		126.723	2.40974	156.372	16.1072	632.947	51.5609	81.0392	-0.896715	0.705147	1.8599
C:\ICPCHEM\1\DATA\palin\100903c\55B-36.D	31	36	9.23818	0.0440847	6.46542	258.288	5.84005	337.445	13.1051		1.34026	0.0423195	0.0197873	0.000281876	0.183665	0.00900886	0.0673189	0.00315971	0.00597509	0.000151933		127.379	2.50939	188.333	26.7363	1043.22	100.568	67.6347	-0.852887	1.40075	2.17393
C:\ICPCHEM\1\DATA\palin\100903c\55B-23.D	21	23	6.89308	0.0323213	12.916	466.384	9.11918	820.258	19.1569		1.80425	0.0230439	0.0196528	0.000225092	0.129174	0.00553633	0.0476705	0.00196883	0.00593077	9.45236e-05		127.534	1.78339	157.936	16.6968	642.182	53.9128	80.7507	-1.66862	0.839999	3.19302
C:\ICPCHEM\1\DATA\palin\100903b\55B-06.D	6	06	8.26101	0.0390791	9.78085	284.203	6.78215	553.616	22.7924		1.99834	0.0670411	0.0228451	0.000428887	0.425297	0.0252412	0.13502	0.0076019	0.0100721	0.000542468		128.12	3.81016	91.8209	54.7922	0.0838793	0.0388312	139.532	12.1329	2.06008	3.48428	128.12	4.19327
C:\ICPCHEM\1\DATA\palin\100903c\55B-25.D	22	25	7.51039	0.0350459	2.53285	103.428	2.04985	68.8595	1.57235		0.682993	0.00774519	0.0217679	0.000394326	0.343885	0.0216152	0.114576	0.00689621	0.0108719	0.000412146		129.44	2.51614	156.497	23.5206	588.475	71.9002	82.7104	6.82506	0.705683	1.20813	129.44	3.1871
C:\ICPCHEM\1\DATA\palin\100903b\55B-13.D	13	13	bdl		5.45201	226.002	11.0527	188.598	10.0731		0.856081	0.0183798	0.0207793	0.000315732	0.151907	0.011265	0.0530205	0.00384845	0.00725215	0.000319008		130.392	2.27192	106.504	21.4952	0.2141	0.038663	122.43	1.66657	0.873487	1.07427
C:\ICPCHEM\1\DATA\palin\100903b\55B-15.D	14	15	6.07307	0.0353515	9.58763	325.635	3.77631	740.418	15.8719		2.33257	0.0420532	0.0191689	0.000218941	0.123411	0.00650145	0.0466935	0.00240136	0.00526123	7.84325e-05		130.883	2.49282	253.441	27.3176	1628.74	97.5635	51.6423	-7.00005	1.65671	2.17393
C:\ICPCHEM\1\DATA\palin\100903c\55B-24.D	21	24	13.3791	0.0307168	19.314	597.084	7.61498	1605.04	23.1972		2.75765	0.0187495	0.0194026	0.000183871	0.123882	0.00425284	0.0463072	0.00152794	0.00556213	5.93078e-05		131.754	1.88898	244.748	19.6814	1542.62	70.8505	53.8326	-6.42236	1.16572	3.9613
C:\ICPCHEM\1\DATA\palin\100903b\55B-05.D	5	05	5.1507	0.0392991	10.7393	326.737	2.99534	758.816	7.80876		2.38247	0.0111384	0.0211561	0.000358108	0.14975	0.00997303	0.0513369	0.00330665	0.00606698	0.000109132		141.266	2.83647	241.987	23.0769	1384.53	79.5292	58.3777	-4.72515	1.17347	2.89414
aIsotopic ratio errors include internal (analytical) uncertainty only
b208Pb-corrected age errors include internal (analytical) uncertainty only
cUncertainty in the primary standard has been added in quadrature to the selected 208Pb-corrected ages. For session 100903b: 206Pb/238U 1σTEMORA-2 = 1.37%, 207Pb/206Pb 1σTEMORA-2 = 3.74%. For session 100903c: 206Pb/238U 1σTEMORA-2 = 1.51%, 207Pb/206Pb 1σTEMORA-2 = 4.02%.

## Sheet: Woodham OU81904
Woodham Orthogneiss hbl–bt qz monzodioritic orthogneiss (OU81904) LA–ICP–MS U–Th–Pb zircon data
											Measured isotopic ratiosa											208Pb-corrected (*) dates (Ma)b, c
Analysis ID	Grain	Spot no.	Ti (ppm)	± 1σ	Pb* (ppm)	U (ppm)	± 1σ	Th (ppm)	± 1σ		232Th/238U	± 1σ	206Pb/238U	± 1σ	207Pb/235U	± 1σ	207Pb/206Pb	± 1σ	208Pb/232Th	± 1σ		206Pb*/238U	± 1σ	207Pb*/235U	± 1σ	207Pb*/206Pb*	± 1σ	206Pb*/238U–207Pb*/235U concord. (%)	206Pbc (%)	± 1σ	MSWD	Selected	± 1σ
C:\ICPCHEM\1\DATA\palin\100902a\55A-46.D	37	46	36.9847	0.126159	5.10227	203.486	3.33858	134.229	2.38347		0.67671	0.00459526	0.0222083	0.000780929	0.718959	0.0568147	0.234794	0.0707688	0.0190876	0.0667105		114.515	4.701	192.074	56.0147	1298.68	232.582	59.6201	19.2968	1.76608	4.6409
C:\ICPCHEM\1\DATA\palin\100902a\55A-26.D	20	26	9.54847	0.0328335	5.36932	251.322	1.62037	244.856	2.2252		0.999469	0.00640119	0.018089	0.000177269	0.160909	0.00789351	0.0645154	0.0480669	0.00569333	0.0218492		115.598	1.22213	151.996	10.0993	765.366	38.0285	76.0533	-0.0263621	0.421487	1.39834
C:\ICPCHEM\1\DATA\palin\100902a\55A-39.D	31	39	23.0762	0.0364155	13.3691	539.312	16.1806	903.966	38.8949		1.7195	0.0530313	0.0179216	0.000162138	0.124999	0.00538756	0.0505858	0.0421406	0.00526684	0.0194057		118.172	1.93768	180.033	24.2738	1096.39	98.0275	65.6388	-3.22964	1.43033	1.90552
C:\ICPCHEM\1\DATA\palin\100902a\55A-44.D	36	44	8.83207	0.0309717	5.40634	244.8	9.93999	146.635	9.09869		0.614493	0.0288317	0.0195267	0.00025448	0.227626	0.0110112	0.0845456	0.0465855	0.00996239	0.0397304		118.358	1.76787	104.868	17.5727	0.547632	0.088961	112.865	5.10475	0.718866	1.5033	118.358	2.64868
C:\ICPCHEM\1\DATA\palin\100902a\55A-31.D	25	31	8.91348	0.0263429	16.3087	623.872	20.1603	1110.5	40.3948		1.82605	0.0304965	0.0185838	0.000160906	0.19144	0.0066532	0.0747129	0.0336576	0.00591446	0.0140561		118.688	1.47915	177.678	16.795	1058.73	67.2356	66.7996	0.00945603	0.912202	3.31031
C:\ICPCHEM\1\DATA\palin\100902a\55A-07.D	6	07	14.5403	0.0456539	3.77986	165.943	1.39792	117.991	1.29446		0.729423	0.00512637	0.0200593	0.000280883	0.332227	0.0164129	0.120121	0.0473766	0.00995836	0.0228502		118.836	1.78733	149.748	17.5046	672.078	61.3533	79.3574	7.24783	0.543532	1.81188
C:\ICPCHEM\1\DATA\palin\100902a\55A-23.D	18	23	7.09257	0.0394074	18.3281	718.956	53.7428	1093.4	109.045		1.56015	0.102997	0.0188407	0.000229902	0.123376	0.00483584	0.0474934	0.037248	0.00597669	0.019016		120.481	3.71714	120.775	55.1053	125.702	57.1173	99.7565	-0.130511	2.86889	4.3217	120.481	4.22469
C:\ICPCHEM\1\DATA\palin\100902a\55A-28.D	22	28	5.8057	0.0172093	4.11085	204.688	2.17198	103.827	1.85088		0.520363	0.00745389	0.0189308	0.000241316	0.114771	0.00660456	0.0439707	0.0561158	0.00624391	0.0271095		120.516	1.56297	103.8	8.41007	0.416476	0.0315025	116.105	0.316172	0.296857	2.15121	120.516	2.54483
C:\ICPCHEM\1\DATA\palin\100902a\55A-18.D	15	18	25.7393	0.174272	7.0056	278.028	4.96299	305.607	12.35		1.12762	0.0408819	0.0199702	0.000239847	0.245731	0.0132738	0.0892434	0.0526657	0.00836846	0.0416696		120.647	1.90823	112.465	23.6219	1.95848	0.422547	107.275	5.40121	0.995041	1.70912	120.647	2.77189
C:\ICPCHEM\1\DATA\palin\100902a\55A-53.D	43	53	3.85866	0.0201336	4.57386	241.597	4.23926	80.0191	1.68439		0.339775	0.00395083	0.0189159	0.000249891	0.123996	0.00756434	0.0475423	0.059557	0.00561625	0.0424585		121.19	1.61071	125.289	8.15217	203.229	12.4993	96.7285	-0.32499	0.234698	1.37428	121.19	2.5832
C:\ICPCHEM\1\DATA\palin\100902a\55A-01.D	1	01	10.6021	0.0410797	8.24147	358.795	8.4069	361.457	12.2		1.03347	0.0251075	0.0191261	0.000224722	0.155427	0.00585692	0.0589385	0.0358042	0.00627077	0.0171029		121.394	1.64031	134.415	14.1044	370.847	34.5481	90.3123	0.608913	0.688571	2.41331	121.394	2.60439
C:\ICPCHEM\1\DATA\palin\100902a\55A-37.D	30	37	7.21601	0.0238299	9.14666	380.344	2.32911	522.323	3.73266		1.40881	0.00518963	0.0186135	0.000203453	0.109365	0.00568937	0.0426137	0.0508607	0.00534703	0.0161986		121.676	1.43556	152.38	10.126	661.217	34.2917	79.8501	-2.36787	0.484195	2.01209
C:\ICPCHEM\1\DATA\palin\100902a\55A-03.D	1	03	17.641	0.0570054	10.7137	420.129	10.083	654.747	19.549		1.59875	0.0283962	0.0188621	0.000152847	0.135425	0.00464195	0.0520724	0.0333053	0.00577341	0.0159		121.767	1.39648	150.743	15.8812	634.611	53.2181	80.7777	-1.0947	0.835885	1.75264
C:\ICPCHEM\1\DATA\palin\100902a\55A-41.D	33	41	3.50045	0.02087	9.80548	412.49	25.6314	503.388	35.6267		1.25193	0.0424137	0.0189584	0.000176731	0.141445	0.00619626	0.0541109	0.0428035	0.00579526	0.0200367		122.118	1.76332	151.76	21.5279	643.938	72.495	80.468	-0.874224	1.13041	1.80717	122.118	2.69268
C:\ICPCHEM\1\DATA\palin\100902a\55A-57.D	47	57	11.3383	0.0836414	6.92572	314.292	7.89606	159.57	4.42855		0.520844	0.0061417	0.0202923	0.000344618	0.275162	0.0186234	0.0983458	0.0655162	0.0106673	0.0604293		122.214	2.34777	130.976	24.202	292.661	49.8403	93.3103	5.6818	0.883146	1.49473	122.214	3.10802
C:\ICPCHEM\1\DATA\palin\100902a\55A-32.D	26	32	10.7596	0.0320265	12.1223	462.935	14.8043	739.721	26.756		1.63922	0.0277034	0.019135	0.000167912	0.159397	0.00785698	0.0604158	0.0485046	0.00608649	0.0186836		122.587	1.45327	156.758	16.5577	710.356	57.9224	78.2014	-0.330475	0.816528	2.15121
C:\ICPCHEM\1\DATA\palin\100902a\55A-36.D	29	36	5.89343	0.0286798	4.31489	220.157	3.23381	96.1628	1.62182		0.448088	0.00371355	0.0190856	0.000242937	0.124565	0.00776793	0.0473357	0.0610475	0.00533602	0.0345249		122.92	1.57883	136.854	8.40309	385.717	20.6487	89.8186	-0.866502	0.249644	2.15121	122.92	2.58622
C:\ICPCHEM\1\DATA\palin\100902a\55A-30.D	24	30	5.87503	0.0161052	12.7122	531.408	14.6349	650.316	19.4789		1.25541	0.0147866	0.0190741	0.000156492	0.130096	0.00427759	0.0494674	0.0318402	0.00574394	0.0139656		123.105	1.19038	146.028	10.7036	536.49	32.5439	84.3024	-1.08043	0.534765	2.11519	123.105	2.3718
C:\ICPCHEM\1\DATA\palin\100902a\55A-20.D	17	20	5.55717	0.0267086	19.2104	743.844	32.9142	1134.99	62.3887		1.56531	0.0510482	0.019153	0.000180449	0.123419	0.00367562	0.0467353	0.0282521	0.00592591	0.0160688		123.143	2.14292	132.425	28.8048	301.988	60.4383	92.9906	-0.695563	1.49319	3.99861	123.143	2.96701
C:\ICPCHEM\1\DATA\palin\100902a\55A-54.D	44	54	6.27691	0.0325316	3.82343	185.852	2.93193	100.747	3.91636		0.556101	0.0197573	0.0193883	0.000299802	0.151167	0.0120029	0.0565481	0.0778808	0.00618239	0.0369978		123.38	2.06014	136.125	16.7299	364.387	39.8774	90.6373	0.333148	0.669175	1.71069	123.38	2.91058
C:\ICPCHEM\1\DATA\palin\100902a\55A-58.D	48	58	4.21646	0.024783	4.60043	236.748	1.88851	81.5564	2.41285		0.353395	0.010068	0.0192906	0.000203178	0.116591	0.0077624	0.0438348	0.0657397	0.00583028	0.0358565		123.559	1.33326	118.606	8.92244	25.0791	1.95221	104.176	-0.317915	0.279295	2.15121	123.559	2.45298
C:\ICPCHEM\1\DATA\palin\100902a\55A-15.D	12	15	3.99804	0.021799	7.4803	345.126	4.39678	259.852	13.0889		0.772391	0.0376409	0.0192746	0.00016216	0.137865	0.00488743	0.0518761	0.0344381	0.00599036	0.0199413		123.573	1.50001	139.577	17.6229	420.93	46.3769	88.5339	-0.41304	0.894816	1.27606	123.573	2.54765
C:\ICPCHEM\1\DATA\palin\100902a\55A-45.D	37	45	12.6899	0.0418777	3.34301	157.622	1.32433	115.429	1.79094		0.751258	0.0097991	0.0191538	0.000360785	0.137764	0.012084	0.0521651	0.0856687	0.00545587	0.0509963		123.808	2.42696	156.025	15.5787	678.186	52.383	79.3517	-1.24032	0.614971	2.15121
C:\ICPCHEM\1\DATA\palin\100902a\55A-42.D	34	42	9.45044	0.0213073	3.86407	187.589	2.79758	104.3	1.72884		0.570385	0.00412659	0.019352	0.000251223	0.14828	0.00861253	0.0555719	0.0566136	0.00596263	0.0333535		123.863	1.64274	145.443	9.83629	513.427	28.7524	85.1627	-0.248106	0.329067	2.15121	123.863	2.63799
C:\ICPCHEM\1\DATA\palin\100902a\55A-55.D	45	55	5.32553	0.0186331	5.25714	241.064	2.24813	166.952	1.89202		0.710475	0.00457461	0.0195615	0.000246689	0.140621	0.0098748	0.0521372	0.0690811	0.00657497	0.031911		124.003	1.63498	118.706	12.2686	19.7753	2.12358	104.463	0.711823	0.423311	1.53292	124.003	2.63501
C:\ICPCHEM\1\DATA\palin\100902a\55A-19.D	16	19	18.9659	0.0219001	17.4585	637.784	10.8453	1131.08	20.4865		1.81932	0.0113462	0.019264	0.000163248	0.125391	0.00363348	0.0472083	0.0277104	0.00597344	0.0132581		124.045	1.25329	137.532	11.4384	376.889	27.8165	90.1939	-0.855722	0.572722	3.41683	124.045	2.41738
C:\ICPCHEM\1\DATA\palin\100902a\55A-52.D	42	52	8.36557	0.0187895	4.21552	196.343	1.45627	149.922	1.45802		0.783322	0.00492732	0.019206	0.000268052	0.128582	0.00911449	0.0485559	0.069497	0.00550517	0.0239813		124.075	1.77197	146.944	10.6251	533.832	31.6858	84.4371	-1.18451	0.366625	2.15121	124.075	2.72303
C:\ICPCHEM\1\DATA\palin\100902a\55A-09.D	7	09	7.62579	0.0160462	7.46623	325.603	18.8785	348.68	23.7041		1.09857	0.038994	0.0190684	0.000194384	0.136476	0.00600087	0.0519086	0.0427723	0.00546315	0.0193258		124.094	1.74191	168.38	18.9166	847.142	69.5712	73.6987	-1.93026	1.00361	1.97565
C:\ICPCHEM\1\DATA\palin\100902a\55A-29.D	23	29	8.17056	0.0218403	4.80285	221.466	6.29589	157.667	6.75991		0.730335	0.0234399	0.0194537	0.000238469	0.136219	0.00735363	0.0507851	0.0525735	0.00619246	0.025123		124.143	1.68131	128.678	13.56	212.775	21.3805	96.4761	0.0478812	0.605638	1.53472	124.143	2.66581
C:\ICPCHEM\1\DATA\palin\100902a\55A-51.D	41	51	7.22621	0.0282585	9.35247	401.845	4.40795	444.595	13.1769		1.135	0.0312502	0.0191561	0.000191446	0.136687	0.00572728	0.0517509	0.0406914	0.0055787	0.0154526		124.371	1.59398	164.061	16.1117	783.55	57.642	75.808	-1.69285	0.835949	1.82598
C:\ICPCHEM\1\DATA\palin\100902a\55A-33.D	27	33	22.5829	0.02765	5.66245	236.468	2.5373	296.114	3.57726		1.28462	0.00713057	0.0191143	0.000233849	0.130074	0.0070186	0.0493549	0.0525533	0.00547387	0.0199496		124.592	1.65416	166.253	11.9182	809.958	42.7229	74.9414	-2.09804	0.559463	1.70349
C:\ICPCHEM\1\DATA\palin\100902a\55A-48.D	39	48	18.3437	0.0268108	9.95306	376.658	20.5042	649.971	39.5731		1.77026	0.0482701	0.0189563	0.000264816	0.125361	0.0065227	0.0479633	0.0501207	0.00553235	0.0216682		124.679	2.45085	179.757	26.366	983.783	100.055	69.3596	-3.02154	1.45252	2.15121
C:\ICPCHEM\1\DATA\palin\100902a\55A-02.D	2	02	6.66819	0.0156185	16.6925	628.849	20.7024	1113.19	42.9992		1.81599	0.0366921	0.0189413	0.000166336	0.125026	0.00351085	0.0478729	0.0266724	0.00543421	0.0100179		125.131	1.76007	188.216	20.4372	1078.01	78.4461	66.4828	-3.48069	1.1551	3.99553
C:\ICPCHEM\1\DATA\palin\100902a\55A-04.D	3	04	16.1592	0.0272849	9.64825	368.976	8.36837	604.391	14.066		1.68038	0.00877262	0.0191555	0.00017537	0.142044	0.00566457	0.0537808	0.038814	0.00563949	0.0139586		125.175	1.33216	181.704	11.3963	999.502	43.0229	68.8897	-2.36008	0.575967	2.15121
C:\ICPCHEM\1\DATA\palin\100902a\55A-11.D	9	11	10.7213	0.0352617	3.95502	173.568	2.01461	138.801	2.76415		0.820371	0.0132755	0.0197981	0.000226291	0.117607	0.00714149	0.0430832	0.0596381	0.00666545	0.0238748		125.185	1.55045	92.2207	12.4486	0.117063	0.0125737	135.745	0.954186	0.502633	1.3865
C:\ICPCHEM\1\DATA\palin\100902a\55A-27.D	21	27	5.4835	0.0208228	3.83465	189.365	1.83146	76.6124	0.917684		0.415037	0.002933	0.0196959	0.000237742	0.126406	0.00857127	0.0465471	0.0667242	0.00643724	0.0290144		125.414	1.52755	115.415	9.09977	1.24987	0.0994114	108.664	0.25663	0.235264	1.37101	125.414	2.58867
C:\ICPCHEM\1\DATA\palin\100902a\55A-40.D	32	40	3.93509	0.0208508	3.75047	194.876	1.56441	51.7512	0.524434		0.272427	0.00168485	0.0196085	0.000288823	0.133072	0.0074253	0.0492201	0.0538197	0.0058063	0.0488801		125.444	1.84655	131.294	7.71871	238.032	12.921	95.5444	-0.212294	0.199805	1.33933	125.444	2.78921
C:\ICPCHEM\1\DATA\palin\100902a\55A-25.D	20	25	19.4303	0.0278291	11.0676	424.946	4.21381	629.749	8.81834		1.52027	0.015031	0.0195327	0.000179435	0.129637	0.00388578	0.0481356	0.0285318	0.00602222	0.0122725		125.546	1.35179	137.977	11.888	357.341	27.5654	90.99	-0.683143	0.585531	2.9096	125.546	2.49084
C:\ICPCHEM\1\DATA\palin\100902a\55A-43.D	35	43	9.44298	0.0408202	7.68923	322.793	10.5829	372.999	19.3344		1.18542	0.0475939	0.0193091	0.000266514	0.134704	0.00761086	0.0505964	0.0547887	0.00569039	0.0258987		125.553	2.23019	165.846	22.5122	788.123	80.0481	75.7046	-1.85517	1.16671	2.81311
C:\ICPCHEM\1\DATA\palin\100902a\55A-17.D	14	17	17.4726	0.0274914	5.95273	225.947	6.25666	297.256	9.50944		1.34962	0.0216205	0.0204656	0.000283214	0.244476	0.0127641	0.0866385	0.0503425	0.0073824	0.0209633		125.566	2.09919	141.479	21.7946	417.246	56.1717	88.7526	3.89059	0.929186	2.72887	125.566	2.96395
C:\ICPCHEM\1\DATA\palin\100902a\55A-05.D	4	05	5.91395	0.0143878	6.04045	253.66	3.35374	180.186	4.39666		0.728716	0.0149447	0.0207762	0.000217525	0.237181	0.00798066	0.0827965	0.0319777	0.00942134	0.0249325		125.765	1.47463	104.979	13.3533	0.271799	0.0315601	119.8	5.17585	0.524262	1.44411	125.765	2.56258
C:\ICPCHEM\1\DATA\palin\100902a\55A-24.D	19	24	20.167	0.0236038	2.74916	113.605	3.49851	125.792	4.26586		1.13591	0.0161314	0.0197213	0.000270606	0.132246	0.00854776	0.0486346	0.0631619	0.00615942	0.0233818		126.106	1.88423	129.685	14.631	195.264	21.1829	97.2402	-0.169581	0.628562	1.18742	126.106	2.82249
C:\ICPCHEM\1\DATA\palin\100902a\55A-59.D	48	59	3.87475	0.029244	4.67935	236.54	3.32289	73.9265	1.71877		0.320616	0.00593966	0.0197897	0.000240232	0.126951	0.00822268	0.0465262	0.0636226	0.00621503	0.0396895		126.488	1.54746	124.093	8.71707	79.8541	5.64872	101.93	-0.12893	0.229872	2.15121	126.488	2.61487
C:\ICPCHEM\1\DATA\palin\100902a\55A-38.D	31	38	17.5478	0.0389686	13.2879	478.685	8.15257	870.579	18.6129		1.86572	0.0241134	0.0194875	0.000189525	0.158819	0.00772124	0.0591076	0.047634	0.00592275	0.0179794		127.2	1.60137	194.673	16.3188	1118.93	61.8652	65.3401	-2.25924	0.837424	2.15121
C:\ICPCHEM\1\DATA\palin\100902a\55A-14.D	12	14	8.83917	0.0292383	10.4698	413.503	24.1831	553.369	36.4531		1.37285	0.0416222	0.0196519	0.000246238	0.125039	0.0038831	0.0461467	0.028415	0.00582136	0.0235622		127.852	2.10002	159.646	21.3006	661.779	69.6455	80.0847	-1.92903	1.10812	3.21795	127.852	2.99154
C:\ICPCHEM\1\DATA\palin\100902a\55A-60.D	49	60	72.6198	0.0559784	5.60954	223.359	1.48638	273.596	4.48161		1.2566	0.0188084	0.0200948	0.000233487	0.198382	0.00945944	0.0716006	0.0462456	0.00640163	0.0222019		127.864	1.79198	177.479	17.2065	903.091	62.6387	72.0446	0.308113	0.805806	1.59375
C:\ICPCHEM\1\DATA\palin\100902a\55A-21.D	18	21	14.8239	0.0217894	4.46501	196.635	3.80774	157.869	4.94485		0.823617	0.020277	0.0199972	0.000218435	0.160373	0.00811435	0.0581648	0.0494036	0.00624139	0.0228336		127.943	1.57026	156.054	13.4036	607.29	41.9726	81.9867	-0.241285	0.587289	1.42612
C:\ICPCHEM\1\DATA\palin\100902a\55A-47.D	38	47	17.2888	0.037765	10.9524	398.305	7.59907	645.411	14.8446		1.6623	0.0213537	0.0201984	0.000195061	0.215239	0.0077794	0.0772863	0.034829	0.00648861	0.0149138		128.435	1.56013	190.414	15.4826	1050.66	57.8178	67.4501	0.372411	0.753879	1.8752
C:\ICPCHEM\1\DATA\palin\100902a\55A-35.D	28	35	7.65477	0.0217603	11.0258	517.956	18.7246	289.637	11.4791		0.573654	0.00931836	0.0199984	0.000187664	0.137408	0.00581312	0.049833	0.0412515	0.00591283	0.0227792		128.495	1.24907	144.935	7.70122	423.014	19.4326	88.6566	-0.671523	0.290643	1.71199	128.495	2.47895
C:\ICPCHEM\1\DATA\palin\100902a\55A-06.D	5	06	10.9474	0.0204449	12.2868	495.41	11.5105	592.256	16.0212		1.2264	0.0169906	0.0199296	0.000187416	0.15006	0.00618846	0.054609	0.0401534	0.00601135	0.0156385		128.656	1.36762	165.759	11.347	734.91	38.3967	77.616	-1.14692	0.524013	2.11887
C:\ICPCHEM\1\DATA\palin\100902a\55A-50.D	40	50	9.78153	0.023097	26.4482	971.187	14.917	1758.51	28.1218		1.8575	0.00827055	0.0193415	0.00017276	0.130326	0.00329244	0.0488696	0.0236315	0.00540606	0.0117739		129.193	1.26526	216.711	8.22991	1320.93	30.2931	59.6156	-4.66261	0.444902	3.48785
C:\ICPCHEM\1\DATA\palin\100902a\55A-49.D	39	49	8.01441	0.0257212	3.08267	142.05	1.99704	86.8555	1.77875		0.627257	0.0093409	0.0201374	0.00029475	0.150016	0.0102792	0.0540299	0.0669391	0.00599726	0.0370498		129.291	1.95179	154.629	12.3244	562.842	36.5392	83.6134	-0.602633	0.429905	1.23924	129.291	2.90715
C:\ICPCHEM\1\DATA\palin\100902a\55A-12.D	10	12	5.6365	0.0394089	7.41993	280.883	2.92299	401.66	5.63873		1.46697	0.0138229	0.020098	0.000257255	0.135938	0.00755112	0.0490556	0.0540533	0.00609738	0.0144669		129.604	1.82265	151.6	13.9201	510.868	39.2713	85.4908	-1.04622	0.622428	2.05842	129.604	2.82605
C:\ICPCHEM\1\DATA\palin\100902a\55A-10.D	8	10	7.50008	0.0203511	3.59962	159.43	3.03111	107.369	2.90841		0.690873	0.0133303	0.0204522	0.00025965	0.159495	0.00722151	0.0565595	0.0434612	0.00671914	0.0289928		129.845	1.75608	139.159	12.0237	300.825	23.8102	93.3073	0.516729	0.501864	2.15121	129.845	2.7867
C:\ICPCHEM\1\DATA\palin\100902a\55A-08.D	6	08	9.13252	0.0228162	12.0647	411.417	9.51656	801.731	18.936		1.99911	0.009546	0.020001	0.000220852	0.125082	0.00616117	0.0453568	0.0480034	0.00604844	0.0115749		129.944	1.62785	157.821	13.3498	599.701	40.9643	82.336	-1.80525	0.62919	2.96166
C:\ICPCHEM\1\DATA\palin\100902a\55A-34.D	28	34	4.79014	0.0291491	9.53847	424.812	16.6445	312.94	13.1181		0.755707	0.0112608	0.0201756	0.000213353	0.13697	0.00652027	0.0492376	0.0464143	0.00589416	0.0210109		130.022	1.42914	151.314	8.86015	499.203	24.467	85.9291	-0.98572	0.34163	1.73238	130.022	2.5956
C:\ICPCHEM\1\DATA\palin\100902a\55A-56.D	46	56	7.64199	0.0305938	13.2138	475.545	20.4402	694.542	30.4165		1.49829	0.0125681	0.0208389	0.000239122	0.170657	0.00728674	0.0593947	0.0411274	0.00689662	0.0192442		131.009	1.70748	127.579	14.8739	65.8607	7.86156	102.688	1.47905	0.636038	2.92278	131.009	2.77159
C:\ICPCHEM\1\DATA\palin\100902a\55A-16.D	13	16	13.6642	0.0214549	12.5822	414.907	12.3889	735.659	23.0839		1.81892	0.017544	0.0212126	0.000228923	0.210902	0.0118759	0.0721086	0.0552659	0.00736447	0.030618		131.092	1.94946	125.097	24.215	18.8821	3.82877	104.793	3.15246	1.01211	2.15121	131.092	2.92791
C:\ICPCHEM\1\DATA\palin\100902a\55A-13.D	11	13	8.88738	0.0242483	4.56617	197.786	4.97552	151.615	4.2874		0.786386	0.0101571	0.0205878	0.000276438	0.139121	0.00831692	0.0490095	0.0582545	0.00609971	0.0296603		132.193	1.8581	146.033	11.9692	376.939	27.3477	90.5229	-0.633209	0.465157	1.29963	132.193	2.8819
C:\ICPCHEM\1\DATA\palin\100902a\55A-22.D	18	22	17.6552	0.0349207	5.3878	208.82	6.68032	248.933	9.00146		1.22292	0.0206144	0.0206596	0.000250606	0.137591	0.00733608	0.0483024	0.0519197	0.00632103	0.0190847		132.745	1.8051	146.33	14.7373	372.364	33.4401	90.7161	-0.706741	0.649615	1.73994
aIsotopic ratio errors include internal (analytical) uncertainty only
b208Pb-corrected age errors include internal (analytical) uncertainty only
cUncertainty in the primary standard has been added in quadrature to the selected 208Pb-corrected ages: 206Pb/238U 1σTEMORA-2 = 1.67%, 207Pb/206Pb 1σTEMORA-2 = 3.73%

## Sheet: McKnee OU81941
McKnee Intrusives granodiorite (OU81941) LA–ICP–MS U–Th–Pb zircon data
											Measured isotopic ratiosa											208Pb-corrected (*) dates (Ma)b, c
analysis ID	Grain no.	Spot no.	Ti (ppm)	± 1σ	Pb* (ppm)	U (ppm)	± 1σ	Th (ppm)	± 1σ		232Th/238U	± 1σ	206Pb/238U	± 1σ	207Pb/235U	± 1σ	207Pb/206Pb	± 1σ	208Pb/232Th	± 1σ		206Pb*/238U	± 1σ	207Pb*/235U	± 1σ	207Pb*/206Pb*	± 1σ	206Pb*/238U–207Pb*/235U concord. (%)	206Pbc (%)	± 1σ	MSWD	Selected	± 1σ
C:\Agilent\ICPMH\1\DATA\111102-palin-1.b\95-16.d	40	16	10.5435	0.0631436	21.0265	774.756	41.3123	1082.39	70.3771		1.43321	0.0533235	0.0205708	0.00016345	0.170571	0.00491837	0.0601386	0.00166694	0.00682524	0.000131965		130.116	2.1198	140.955	29.4646	327.258	62.4691	92.3102	0.882311	1.42842	4.98706
C:\Agilent\ICPMH\1\DATA\111102-palin-1.b\95-02.d	26	02	15.2863	0.0486224	66.0175	2105.28	40.5404	4103.5	136.686		1.99956	0.0543467	0.0210018	0.000124765	0.142759	0.00243701	0.0493	0.000788985	0.00697624	8.16739e-05		132.268	2.35464	106.262	36.7935	0.232262	0.0709052	124.473	1.29424	1.67561	10.1867
C:\Agilent\ICPMH\1\DATA\111102-palin-1.b\95-17.d	41	17	6.90616	0.0840146	26.2801	929.261	17.497	1320.83	30.4441		1.45813	0.0193848	0.0212743	0.000219991	0.166724	0.00418442	0.0568382	0.00129982	0.00718665	0.000131068		133.158	1.67596	113.798	16.366	0.357022	0.0483948	117.013	1.89572	0.72613	4.22138	133.158	2.18696
C:\Agilent\ICPMH\1\DATA\111102-palin-1.b\95-26.d	50	26	8.33335	0.0905054	18.385	698.301	27.2395	774.304	34.6304		1.13752	0.0248866	0.0212302	0.000218888	0.16816	0.00605434	0.0574471	0.00198167	0.00724838	0.000160868		133.54	1.62018	126.349	15.0651	7.91845	0.989457	105.692	1.40719	0.653797	4.67075	133.54	2.14715
C:\Agilent\ICPMH\1\DATA\111102-palin-1.b\95-10.d	34	10	9.07324	0.0243259	22.604	751.667	25.309	1300.34	56.2193		1.77468	0.0481295	0.0211469	0.000159688	0.146424	0.0033291	0.0502186	0.00107695	0.00693431	9.32038e-05		133.768	2.01574	119.615	28.5604	0.674228	0.159893	111.832	0.848024	1.31091	10.2693
C:\Agilent\ICPMH\1\DATA\111102-palin-1.b\95-20.d	44	20	8.8932	0.0322351	14.885	569.285	13.38	642.618	21.7284		1.15801	0.0281487	0.0211487	0.000152864	0.139865	0.00337998	0.047965	0.00110606	0.00671356	7.62551e-05		134.623	1.46209	128.05	17.9065	15.4254	2.26524	105.133	0.216251	0.824007	4.81728	134.623	2.03846
C:\Agilent\ICPMH\1\DATA\111102-palin-1.b\95-13.d	37	13	8.62345	0.0383769	10.5935	398.565	11.0741	426.769	16.2946		1.09846	0.0287665	0.0216512	0.000206109	0.14532	0.00434345	0.0486789	0.00137919	0.00716356	0.00011441		136.942	1.66323	118.444	17.5342	0.433673	0.0615268	115.617	0.835529	0.768479	4.94582	136.942	2.20319
C:\Agilent\ICPMH\1\DATA\111102-palin-1.b\95-07.d	31	07	5.00178	0.0451752	10.9684	429.947	10.3689	345.702	10.542		0.824852	0.0153938	0.0220211	0.000255278	0.162517	0.00711257	0.0535251	0.00225886	0.00803191	0.000169982		137.313	1.75708	100.272	14.5101	0.132369	0.0152188	136.94	2.23391	0.560576	4.55517
C:\Agilent\ICPMH\1\DATA\111102-palin-1.b\95-27.d	51	27	5.23176	0.0235916	12.6807	482.344	26.5917	489.772	32.3465		1.04166	0.0378809	0.0217355	0.000183836	0.154954	0.00454734	0.0517048	0.00145297	0.00718478	0.000103168		137.612	1.74491	129.452	21.4116	5.08688	0.883147	106.303	0.731472	0.95581	5.21835	137.612	2.27
C:\Agilent\ICPMH\1\DATA\111102-palin-1.b\95-23.d	47	23	5.42631	0.0282129	9.47741	393.647	8.92088	290.858	6.80068		0.757989	0.00436222	0.0215323	0.000176378	0.150691	0.00485374	0.050757	0.00158113	0.00659424	9.96187e-05		137.861	1.15998	151.294	6.45923	367.094	13.9126	91.1208	-0.38843	0.229545	3.99407	137.861	1.86048
C:\Agilent\ICPMH\1\DATA\111102-palin-1.b\95-15.d	39	15	6.71901	0.0326433	16.2919	632.123	13.0367	556.125	14.1379		0.902526	0.0134156	0.0219607	0.000143259	0.16213	0.00389689	0.0535446	0.00123867	0.00757137	9.26071e-05		138.037	1.03415	118.973	9.22725	0.390576	0.0289082	116.024	1.44255	0.378965	3.90136	138.037	1.78626
C:\Agilent\ICPMH\1\DATA\111102-palin-1.b\95-21.d	45	21	7.67123	0.0246654	25.656	803.127	51.1743	1516.42	114.703		1.93697	0.0789522	0.0216711	0.000180142	0.18215	0.00593401	0.0609602	0.0019202	0.00718185	0.000190757		138.487	3.23519	174.416	45.8734	694.345	143.477	79.4003	-0.203273	2.21462	9.29868	138.487	3.54987
C:\Agilent\ICPMH\1\DATA\111102-palin-1.b\95-25.d	49	25	5.4251	0.0555379	20.5551	753.391	33.5073	718.385	41.8262		0.978196	0.0367546	0.022504	0.000324977	0.171337	0.00552594	0.0552191	0.00159242	0.0085523	0.000283644		138.714	2.51646	79.5182	27.1253	0.0188191	0.00393186	174.443	3.34528	1.09231	11.3981
C:\Agilent\ICPMH\1\DATA\111102-palin-1.b\95-22.d	46	22	4.59061	0.0741529	7.76909	324.361	7.40981	203.151	5.25442		0.642508	0.00779311	0.0218987	0.000191371	0.158775	0.00504064	0.0525849	0.00160493	0.00727874	0.000140104		138.891	1.26608	137.051	7.77041	106.331	6.04521	101.343	0.545716	0.290524	3.05684	138.891	1.93663
C:\Agilent\ICPMH\1\DATA\111102-palin-1.b\95-11.d	35	11	10.1236	0.115788	15.837	637.279	5.02398	448.92	4.78385		0.722651	0.00518137	0.0221575	0.000131184	0.180898	0.00443484	0.0592124	0.00140866	0.00790315	0.000114377		138.931	0.89483	129.923	7.13893	3.31103	0.189536	106.934	1.67835	0.266256	3.56234	138.931	1.71742
C:\Agilent\ICPMH\1\DATA\111102-palin-1.b\95-24.d	48	24	6.79686	0.0263303	6.06936	236.107	5.1023	194.295	5.67133		0.844191	0.0165647	0.0222097	0.000220173	0.161621	0.0063505	0.0527781	0.0020067	0.00769687	0.000134143		139.577	1.54275	117.982	12.9231	0.361805	0.0370366	118.304	1.44842	0.507937	3.72061	139.577	2.13282
C:\Agilent\ICPMH\1\DATA\111102-palin-1.b\95-08.d	32	08	8.0071	0.0251656	8.0537	323.317	3.94433	245.249	3.34245		0.778158	0.00472792	0.0220132	0.000190627	0.152207	0.0051149	0.0501477	0.00162829	0.00717612	0.000136258		139.764	1.25983	133.754	7.72642	31.9603	1.91566	104.494	0.434131	0.282299	3.5557	139.764	1.93954
C:\Agilent\ICPMH\1\DATA\111102-palin-1.b\95-01.d	25	01	6.75216	0.0275238	9.83751	400.715	7.27471	238.042	5.16602		0.609406	0.00724665	0.0223785	0.000197861	0.193146	0.00614055	0.0625972	0.0019116	0.00862523	0.000217983		139.78	1.27374	131.64	7.84988	6.18466	0.384856	106.183	2.04808	0.253169	4.42743	139.78	1.94873
C:\Agilent\ICPMH\1\DATA\111102-palin-1.b\95-09.d	33	09	8.14625	0.256987	10.1734	377.303	12.0933	272.359	9.18647		0.740528	0.00777854	0.0233103	0.000548796	0.287772	0.0321743	0.0895364	0.00978614	0.0111236	0.00112099		139.829	3.87736	117.54	44.6956	0.303447	0.107436	118.962	5.93027	1.43119	4.32762	139.829	4.14857
C:\Agilent\ICPMH\1\DATA\111102-palin-1.b\95-14.d	38	14	5.93432	0.02574	9.00089	358.51	4.50955	286.817	4.37118		0.820716	0.00706227	0.0220067	0.000206453	0.150204	0.00504493	0.0495024	0.00159647	0.00703401	0.000111173		139.949	1.37005	135.768	8.25649	64.9638	4.03805	103.08	0.271828	0.314214	4.72316	139.949	2.01431
C:\Agilent\ICPMH\1\DATA\111102-palin-1.b\95-03.d	27	03	7.04166	0.0303492	5.81538	236.15	3.18586	156.372	2.74269		0.679299	0.00761394	0.0221901	0.000169142	0.148541	0.00497325	0.0485496	0.00158279	0.00759852	0.000170961		140.187	1.14693	118.701	8.5196	0.295988	0.0198765	118.101	0.925881	0.318015	2.00064	140.187	1.8717
C:\Agilent\ICPMH\1\DATA\111102-palin-1.b\95-19.d	43	19	6.4251	0.0566512	6.34905	263.02	4.40049	152.874	2.79124		0.596258	0.00435944	0.0222427	0.000227866	0.166306	0.00633211	0.0542273	0.00198857	0.00782331	0.000168375		140.222	1.47286	129.614	8.36591	1.80307	0.119256	108.184	1.13529	0.276133	4.05809	140.222	2.08764
C:\Agilent\ICPMH\1\DATA\111102-palin-1.b\95-18.d	42	18	5.38915	0.0276877	7.09005	294.67	8.3459	170.331	4.93333		0.59299	0.00359131	0.0221912	0.000154055	0.150527	0.00602665	0.0491963	0.00193984	0.00763685	0.000121102		140.261	0.999972	121.636	6.94754	0.450836	0.0247146	115.312	0.877982	0.191956	1.78283	140.261	1.78608
C:\Agilent\ICPMH\1\DATA\111102-palin-1.b\95-05.d	29	05	6.61609	0.03768	5.96033	237.561	3.45671	176.387	2.7208		0.761693	0.00389953	0.0222254	0.000216138	0.146346	0.00503932	0.0477562	0.00157751	0.00732292	0.000138228		140.829	1.42278	123.89	8.35398	0.533185	0.0349673	113.672	0.624629	0.31023	3.72916	140.829	2.05724
C:\Agilent\ICPMH\1\DATA\111102-palin-1.b\95-12.d	36	12	9.0081	0.0292881	20.1685	658.17	42.6407	851.244	58.7071		1.3268	0.03137	0.0233564	0.000235203	0.217668	0.0105075	0.0675909	0.00319103	0.00888426	0.000262295		142.042	2.08521	86.5688	27.8703	0.0267633	0.00565024	164.08	4.61342	1.04007	9.0249
C:\Agilent\ICPMH\1\DATA\111102-palin-1.b\95-07.d	31	07	6.00844	0.0810082	14.7884	513.093	6.95907	650.917	10.8483		1.30142	0.0126048	0.0224435	0.000200094	0.147042	0.00474601	0.047517	0.00147402	0.00731808	0.000143419		142.097	1.48016	122.662	13.4773	0.431402	0.0454612	115.844	0.695458	0.556763	3.27774
C:\Agilent\ICPMH\1\DATA\111102-palin-1.b\95-06.d	30	06	7.01251	0.0315826	6.59619	245.273	7.33589	185.965	5.82023		0.777805	0.00717005	0.0233498	0.000232416	0.236334	0.0109918	0.0734077	0.00333507	0.00960293	0.00020139		142.949	1.51499	120.147	13.3721	0.285164	0.0295653	118.978	3.97071	0.381215	4.00372	142.949	2.13778
C:\Agilent\ICPMH\1\DATA\111102-palin-1.b\95-04.d	28	04	5.87395	0.0306298	8.15637	325.869	6.41621	224.476	5.0757		0.70667	0.00785624	0.0225966	0.000203332	0.152053	0.0049087	0.0488037	0.00151307	0.00711324	0.000124637		144.061	1.34432	143.987	7.71387	143.478	7.58212	100.052	-0.0110794	0.28414	3.83611	144.061	2.02919
aIsotopic ratio errors include internal (analytical) uncertainty only
b208Pb-corrected age errors include internal (analytical) uncertainty only
cUncertainty in the primary standard has been added in quadrature to the selected 208Pb-corrected ages: 206Pb/238U 1σTEMORA-2 = 0.89%, 207Pb/206Pb 1σTEMORA-2 = 3.19%
